# Supplementary material
Source: PubMed Central journal article supplement (PMC9884117)
Supplement: NIHMS1860918-supplement-1.pdf [file NIHMS1860918-supplement-1.pdf]

**Supplemental Figure 1. Changes in CAA over Study Period.**

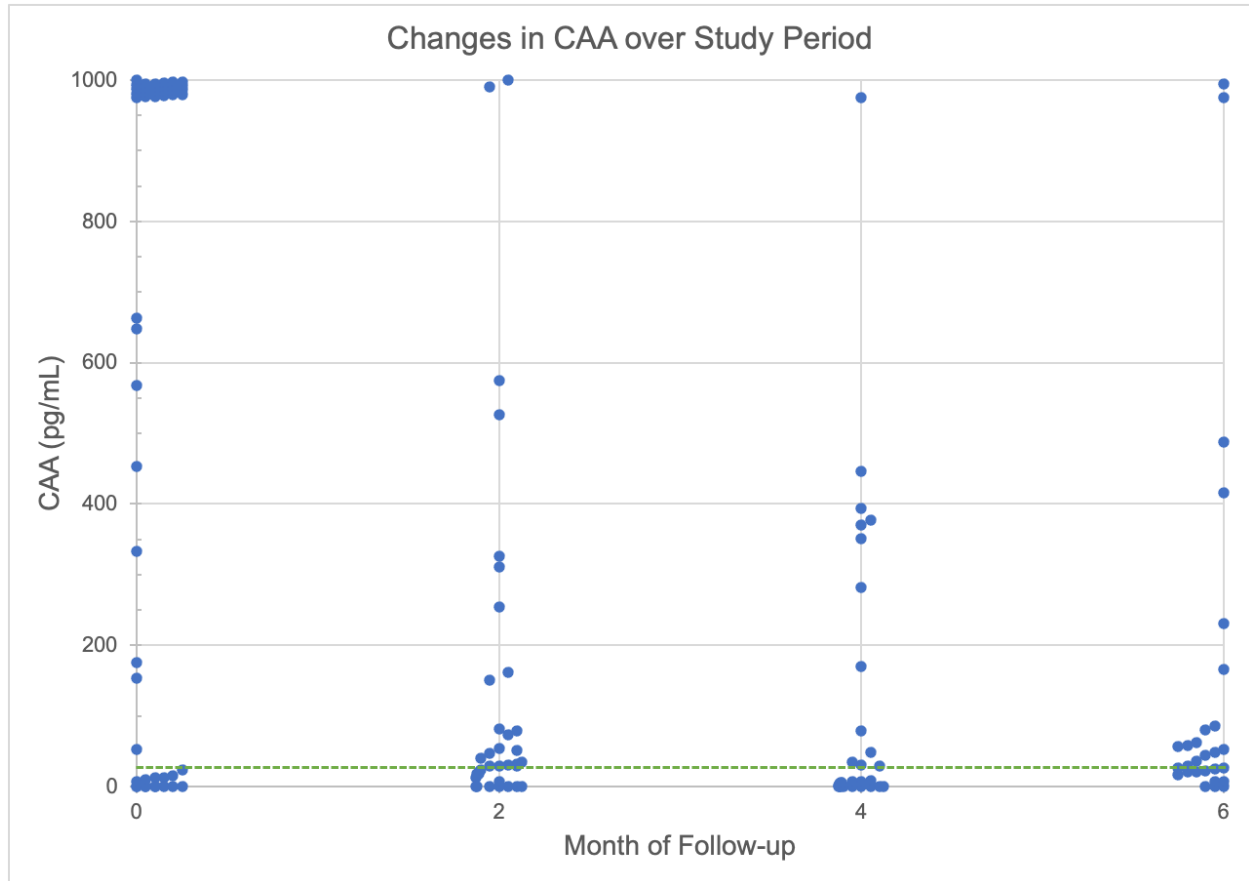

The green dotted line shows a CAA level of 30 pg/mL, which was the cutoff used to indicate schistosome infection. Of note, for the purpose of the figure only, CAA levels over 1000 pg/mL at months 0 (n=25), 2 (n=2), 4 (n=1), and 6 (n=2) were recoded randomly to 975-1000 pg/mL. Clusters of data points at months 0-6 were also randomly jittered to a variance of  $\pm 0.25$  around the corresponding month. These steps were performed to allow better visualization of the figure and to better fit the scale of the axes.
